# Supplementary material
Source: PubMed Central journal article supplement (PMC2686180)
Supplement: blood-2008-09-176412_1.pdf [file blood-2008-09-176412_1.pdf]

| Dog    | Age at transplant        | Days monitored after trx           | Cell # Infused   | Status                                |
|--------|--------------------------|------------------------------------|------------------|---------------------------------------|
| G069 ♀ | 371 days                 | 1972 days                          | 7.4E+08          | Euthanized-poor health                |
| G154 ♀ | 226 days                 | 2340 days                          | 2.9E+08          | Alive                                 |
| G179 ♂ | 221 days                 | 2009 days                          | 3.7E+08          | Euthanized-hemangiosarcoma            |
| G197 ♂ | 281 days                 | 2227 days                          | 4.1E+08          | Alive                                 |
| G403 ♀ | 259 days                 | 1635 days                          | 2.2E+07          | Alive                                 |
| G404 ♂ | 846 days                 | 1048 days                          | 4.9E+09* (150ml) | Alive                                 |
| G340 ♀ | 314 days                 | 1711 days                          | 1.6E+07          | Alive                                 |
| G346 ♂ | 762 days                 | 1264 days                          | 1.1E+09* (150ml) | Alive                                 |
| G187 ♀ | 280 days                 | 1736 days                          | 3.2E+08          | Euthanized-end of study               |
| G192 ♂ | 1033 days                | NA                                 | 1.1E+10* (150ml) | Died-transplant related complications |
| G250 ♂ | 249 days                 | 1780 days                          | 3.6E+07          | Euthanized-end of study               |
| G333 ♂ | 605 days                 | NA                                 | 9.0E+09* (150ml) | Died-transplant related complications |
| G258 ♀ | 260 days                 | 1737 days                          | 7.0E+07          | Alive                                 |
|        | <b>Average follow-up</b> | 1769 days (4.8 years) <sup>†</sup> |                  |                                       |

Current dogs as of 12/21/08

Gray shaded rows indicate secondary recipients of gene-modified grafts from the dog listed immediately above

\*Cells infused are whole cell products not CD34-selected

Volume in parenthesis is the volume of BM product initially drawn from the donor dog

<sup>†</sup>Average follow-up does not include G192 and G333
