# Supplementary material
Source: PubMed Central journal article supplement (PMC2686180)
Supplement: blood-2008-09-176412_2.pdf [file blood-2008-09-176412_2.pdf]

| Gene Name                                                                                                      | Capture # | Gene Abbreviation | RefSeq       | Dog  | Distance (bp) |
|----------------------------------------------------------------------------------------------------------------|-----------|-------------------|--------------|------|---------------|
| microtubule-associated protein RP/EB family member 2                                                           | 1         | MAPRE2            | NM_014268    | G069 | 1566          |
| phosphatidylinositol binding clathrin assembly protein                                                         | 1         | PICALM            | NM_001008660 | G069 | 4952          |
| Friend leukemia virus integration 1                                                                            | 9.75      | FLI1              | NM_002017    | G069 | 9511          |
| ribosomal protein S6 kinase 90kDa polypeptide 1                                                                | 3         | RPS6KA1           | NM_002953    | G197 | 18103         |
| golgi autoantigen golgin subfamily a 5                                                                         | 2.25      | CCDC6             | NM_005436    | G069 | 25833         |
| growth factor independent 1                                                                                    | 2         | GFI1              | NM_005263    | G154 | 26073         |
| LIM domain only 2 (rhombotin-like 1)                                                                           | 3         | LMO2              | NM_005574    | G179 | 33161         |
| protein tyrosine phosphatase receptor type- E                                                                  | 1         | PTPRE             | NM_006504    | G069 | 33990         |
| sushi domain containing 3                                                                                      | 1         | SUSD3             | NM_145006    | G069 | 50355         |
| phosphatidylinositol binding clathrin assembly protein                                                         | 6         | PICALM            | NM_001008660 | G197 | 65072         |
| actin beta                                                                                                     | 1         | ACTB              | NM_001101    | G069 | 68593         |
| CREB binding protein (Rubinstein-Taybi syndrome)                                                               | 10.75     | CREBBP            | NM_004380    | G197 | 74586         |
| interferon regulatory factor 1                                                                                 | 1         | IRF1              | NM_002198    | G069 | 77127         |
| lymphocyte cytosolic protein 1 (L-plastin)                                                                     | 1         | LCP1              | NM_002298    | G197 | 80509         |
| high-mobility group box 1                                                                                      | 2         | HMGB1             | NM_002128    | G179 | 87495         |
| histone 4 H4                                                                                                   | 3         | HIST1H4I          | NM_003495    | G179 | 87889         |
| retinoblastoma 1 (including osteosarcoma)                                                                      | 20        | RB1               | NM_000321    | G179 | 122710        |
| myelodysplasia syndrome 1                                                                                      | 0.5       | MDS1              | NM_004991    | G069 | 123367        |
| interleukin 6 signal transducer (gp130 oncostatin M receptor)                                                  | 1         | IL6ST             | NM_002184    | G154 | 123893        |
| signal peptide peptidase 3                                                                                     | 3.5       | SPPL3             | NM_139015    | G069 | 130574        |
| potassium channel tetramerisation domain containing 2                                                          | 1         | KCTD2             | NM_015353    | G069 | 142652        |
| retinoic acid receptor alpha                                                                                   | 12.5      | RARA              | NM_000964    | G197 | 151044        |
| lymphocyte cytosolic protein 1 (L-plastin)                                                                     | 1         | LCP1              | NM_002298    | G069 | 158213        |
| cysteine-rich protein 2                                                                                        | 3         | CRIP2             | NM_001312    | G197 | 163593        |
| excision repair cross-complementing rodent repair deficiency complementation group 2 (xeroderma pigmentosum D) | 13        | ERCC2             | NM_000400    | G197 | 167563        |
| B-cell CLL/lymphoma 2                                                                                          | 1         | BCL2              | NM_000633    | G069 | 169681        |
| S-antigen; retina and pineal gland (arrestin)                                                                  | 4         | SAG               | NM_000541    | G154 | 180391        |
| B lymphoma Mo-MLV insertion region (mouse)                                                                     | 1         | PCGF4             | NM_005180    | G069 | 182469        |
| kinase insert domain receptor (a type III receptor tyrosine kinase)                                            | 1         | KDR               | NM_002253    | G179 | 188044        |
| runt-related transcription factor 1 (acute myeloid leukemia 1; aml1 oncogene)                                  | 1.25      | EVI1              | NM_005241    | G069 | 191136        |
| frequently rearranged in advanced T-cell lymphomas                                                             | 0.5       | FRAT1             | NM_005479    | G179 | 192821        |
| SRY (sex determining region Y)-box 4                                                                           | 2         | SOX4              | NM_003107    | G154 | 200055        |
| microtubule-associated protein RP/EB family member 2                                                           | 6         | MAPRE2            | NM_014268    | G154 | 211987        |
| high mobility group AT-hook 2                                                                                  | 1         | HMGA2             | NM_001015886 | G179 | 216464        |
| thousand and one amino acid protein kinase                                                                     | 2         | TAKO2             | NM_004783    | G179 | 240950        |
| Ewing sarcoma breakpoint region 1                                                                              | 2         | EWSR1             | NM_013986    | G069 | 247098        |
| mastermind-like 2 (Drosophila)                                                                                 | 2         | MAML2             | NM_032427    | G197 | 251113        |
| nuclear receptor binding SET domain protein 1                                                                  | 1.25      | NSD1              | NM_022455    | G069 | 252194        |
| potassium channel tetramerisation domain containing 2                                                          | 12.25     | KCTD2             | NM_015353    | G069 | 256554        |
| xeroderma pigmentosum complementation group A                                                                  | 13        | XPA               | NM_000380    | G154 | 260058        |
| suppression of tumorigenicity 13 (colon carcinoma) (Hsp70 interacting protein)                                 | 1         | ST13              | NM_003932    | G197 | 274973        |
| solute carrier family 9 (sodium/hydrogen exchanger) isoform 9                                                  | 1         | SLC9A9            | NM_173653    | G069 | 287548        |
| mucin 1 transmembrane                                                                                          | 0.5       | MUC1              | NM_001018016 | G069 | 293343        |
| sialyltransferase 1 (beta-galactoside alpha-2-6-sialyltransferase)                                             | 2.5       | ST6GAL1           | NM_173216    | G069 | 294391        |
| KIAA0117 protein                                                                                               | 3         | RBM34             | NM_015014    | G197 | 297175        |
| nuclear mitotic apparatus protein 1                                                                            | 1         | NUMA1             | NM_006185    | G197 | 305901        |
| v-Ha-ras Harvey rat sarcoma viral oncogene homolog                                                             | 0.5       | NRAS              | NM_002524    | G179 | 319002        |
| MLL septin-like fusion (aka MSF)                                                                               | 1         | SEPT9 (spelling)  | NM_006640    | G154 | 323815        |
| zinc finger DHHC domain containing 14                                                                          | 2         | ZDHHC14           | NM_024630    | G197 | 324847        |
| SMAD- mothers against DPP homolog 3                                                                            | 1         | SMAD3             | NM_005902    | G069 | 359946        |

| Gene Name                                                                                    | Capture # | Gene Abbreviation | RefSeq       | Dog  | Distance (bp) |
|----------------------------------------------------------------------------------------------|-----------|-------------------|--------------|------|---------------|
| (Drosophila)                                                                                 |           |                   |              |      |               |
| PMS2 postmeiotic segregation increased 2 (S. cerevisiae)                                     | 11        | PMS2              | NM_000535    | G179 | 371499        |
| alveolar soft part sarcoma chromosome region-candidate 1                                     | 1         | ASPCR1            | NM_024083    | G197 | 391864        |
| complement component (3d/Epstein Barr virus) receptor 2                                      | 1         | CR2               | NM_001006658 | G179 | 393780        |
| nascent-polypeptide-associated complex alpha polypeptide                                     | 9         | NACA              | NM_005594    | G069 | 417905        |
| thousand and one amino acid protein kinase                                                   | 0.5       | TAOK2             | NM_004783    | G179 | 427359        |
| juxtaposed with another zinc finger gene 1                                                   | 2         | JAZF1             | NM_175061    | G179 | 441680        |
| homeo box A7                                                                                 | 5         | HOXA7             | NM_006896    | G154 | 528631        |
| Rho GTPase activating protein 26                                                             | 1         | ARHGAP26          | NM_015071    | G179 | 533328        |
| neuralized-like (Drosophila)                                                                 | 1         | NEURL             | NM_004210    | G197 | 579608        |
| CD69 antigen (p60 early T-cell activation antigen)                                           | 1         | CD69              | NM_001781    | G069 | 585253        |
| calcium/calmodulin-dependent protein kinase kinase 2 beta                                    | 1         | CAMKK2            | NM_006549    | G179 | 604594        |
| Wilms tumor 1                                                                                | 0.5       | WT1               | NM_000378    | G179 | 606084        |
| murine retrovirus integration site 1 homolog                                                 | 0.5       | MRV11             | NM_130385    | G069 | 611619        |
| juxtaposed with another zinc finger gene 1                                                   | 16        | JAZF1             | NM_175061    | G069 | 655537        |
| Rho GTPase activating protein 26                                                             | 1         | ARHGAP26          | NM_015071    | G179 | 665263        |
| likely ortholog of mouse gene trap locus 3                                                   | 4.25      | GTL3              | NM_013242    | G197 | 747194        |
| smoothened homolog (Drosophila)                                                              | 1         | SMO               | NM_005631    | G069 | 780223        |
| Abelson helper integration site                                                              | 1         | AHI1              | NM_017651    | G069 | 789287        |
| DnaJ (Hsp40) homolog subfamily C member 9                                                    | 0.5       | DNAJC9            | NM_015190    | G154 | 806608        |
| exostoses (multiple) 1                                                                       | 4.75      | EXT1              | NM_000127    | G197 | 809818        |
| nuclear receptor co-repressor 2                                                              | 1         | NCOR2             | NM_006312    | G154 | 824223        |
| coactosin-like 1 (Dictyostelium)                                                             | 8         | COTL1             | NM_021149    | G179 | 830470        |
| nuclear receptor co-repressor 2                                                              | 0.5       | NCOR2             | NM_006312    | G179 | 857640        |
| hypothetical protein FLJ10305                                                                | 2         | VAC14             | NM_018052    | G069 | 859942        |
| Kruppel-like factor 3 (basic)                                                                | 1         | KLF3              | NM_016531    | G154 | 882688        |
| chimerin (chimaerin) 1                                                                       | 0.5       | CHN1              | NM_001025201 | G069 | 906416        |
| SET translocation (myeloid leukemia-associated)                                              | 1         | SET               | NM_003011    | G179 | 914307        |
| DnaJ (Hsp40) homolog subfamily C member 9                                                    | 2         | DNAJC9            | NM_015190    | G179 | 947947        |
| Kruppel-like factor 4 (gut)                                                                  | 1         | KLF4              | NM_004235    | G069 | 968228        |
| cytochrome c oxidase subunit VIc                                                             | 1         | COX6C             | NM_004374    | G197 | 983235        |
| v-akt murine thymoma viral oncogene homolog 1                                                | 2         | AKT1              | NM_005163    | G154 | 1011975       |
| ATP/GTP-binding protein                                                                      | 3         | HEAB              | NM_006831    | G179 | 1031397       |
| growth factor independent 1                                                                  | 0.75      | GFI1              | NM_005263    | G069 | 1035681       |
| mature T-cell proliferation 1                                                                | 1         | MTCP1             | NM_001018025 | G179 | 1072094       |
| chemokine (C-C motif) receptor 5                                                             | 1         | EEF1A1            | NM_001402    | G069 | 1088027       |
| Rho GTPase activating protein 25                                                             | 4         | ARHGAP25          | NM_001007231 | G069 | 1104905       |
| smoothened homolog (Drosophila)                                                              | 1         | SMO               | NM_005631    | G154 | 1133128       |
| smoothened homolog (Drosophila)                                                              | 1         | SMO               | NM_005631    | G069 | 1135723       |
| phosphatidylinositol binding clathrin assembly protein                                       | 2.75      | PICALM            | NM_001008660 | G179 | 1163823       |
| elongation factor RNA polymerase II                                                          | 5.25      | ELL               | NM_006532    | G069 | 1172124       |
| pre-B-cell leukemia transcription factor 1                                                   | 2         | PBX1              | NM_002585    | G154 | 1194324       |
| WD repeat domain 11                                                                          | 6.25      | BRWD2             | NM_018117    | G069 | 1207037       |
| suppression of tumorigenicity 13 (colon carcinoma) (Hsp70 interacting protein)               | 2.75      | ST13              | NM_003932    | G069 | 1226061       |
| hypothetical protein FLJ32312                                                                | 1         | FLJ32312          | NM_144709    | G179 | 1240876       |
| clathrin heavy polypeptide-like 1                                                            | 2         | CLTCL1            | NM_001835    | G197 | 1271834       |
| nuclear receptor coactivator 2                                                               | 0.75      | NCOA2             | NM_006540    | G197 | 1284521       |
| chemokine (C-C motif) receptor 5                                                             | 0.5       | EEF1A1            | NM_001402    | G179 | 1302756       |
| nuclear receptor subfamily 4- group A- member 3                                              | 0.25      | NR4A3             | NM_006981    | G197 | 1321246       |
| jun dimerization protein 2                                                                   | 1         | JDP2              | NM_130469    | G069 | 1352487       |
| myeloid/lymphoid or mixed-lineage leukemia (trithorax homolog Drosophila); translocated to 1 | 1         | MLLT1             | NM_005934    | G179 | 1372020       |
| 5-aminoimidazole-4-carboxamide ribonucleotide formyltransferase/IMP cyclohydrolase           | 1         | ATIC              | NM_004044    | G069 | 1440995       |
| platelet-derived growth factor receptor beta polypeptide                                     | 2         | PDGFRB            | NM_002609    | G179 | 1460101       |
| CCAAT/enhancer binding protein (C/EBP) alpha                                                 | 0.5       | CEBPA             | NM_004364    | G179 | 1470212       |
| myeloid/lymphoid or mixed-lineage leukemia                                                   | 4         | MLLT1             | NM_005934    | G069 | 1608795       |

| Gene Name                                                                                         | Capture # | Gene Abbreviation | RefSeq       | Dog  | Distance (bp) |
|---------------------------------------------------------------------------------------------------|-----------|-------------------|--------------|------|---------------|
| (trithorax homolog Drosophila); translocated to 1                                                 |           |                   |              |      |               |
| retinoic acid receptor alpha                                                                      | 4.25      | NPM1              | NM_002520    | G069 | 1702811       |
| pleiomorphic adenoma gene 1                                                                       | 1         | PLAG1             | NM_002655    | G197 | 1722090       |
| v-maf musculoaponeurotic fibrosarcoma oncogene homolog B (avian)                                  | 1         | MAFB              | NM_005461    | G069 | 1743129       |
| NCK interacting protein with SH3 domain                                                           | 5.75      | NCKIPSD           | NM_016453    | G154 | 1888855       |
| v-Ha-ras Harvey rat sarcoma viral oncogene homolog                                                | 2.5       | NRAS              | NM_002524    | G069 | 1972902       |
| Kruppel-like factor 3 (basic)                                                                     | 6         | KLF3              | NM_016531    | G179 | 1985098       |
| transcription factor 12 (HTF4 helix-loop-helix transcription factors 4)                           | 1         | TCF12             | NM_003205    | G197 | 1995597       |
| high mobility group AT-hook 1                                                                     | 5         | HMGA1             | NM_002131    | G197 | 2133480       |
| protein kinase cGMP-dependent type II                                                             | 1         | PRKG2             | NM_006259    | G069 | 2167889       |
| acidic (leucine-rich) nuclear phosphoprotein 32 family member B                                   | 2         | ANP32B            | NM_006401    | G197 | 2169930       |
| GNAS complex locus                                                                                | 3         | GNAS              | NM_000516    | G197 | 2272606       |
| epidermal growth factor receptor (erythroblastic leukemia viral (v-erb-b) oncogene homolog avian) | 0.5       | EGFR              | NM_005228    | G069 | 2300088       |
| succinate dehydrogenase complex subunit C integral membrane protein 15kDa                         | 2         | SDHC              | NM_001035511 | G069 | 2317396       |
| TCF3 (E2A) fusion partner (in childhood Leukemia)                                                 | 1         | TFPT              | NM_013342    | G069 | 2341821       |
| Werner syndrome                                                                                   | 1         | WRN               | NM_000553    | G069 | 2355959       |
| MCM5 minichromosome maintenance deficient 5 cell division cycle 46 (S. cerevisiae)                | 2         | MCM5              | NM_006739    | G154 | 2465332       |
| myelodysplasia syndrome 1                                                                         | 1         | MDS1              | NM_004991    | G154 | 2486607       |
| Werner syndrome                                                                                   | 3         | WRN               | NM_000553    | G154 | 2502768       |
| nuclear factor of kappa light polypeptide gene enhancer in B-cells inhibitor alpha                | 3         | NFKBIA            | NM_020529    | G154 | 2531391       |
| fragile histidine triad gene                                                                      | 1         | FHIT              | NM_002012    | G179 | 2539181       |
| hypothetical protein FLJ32786                                                                     | 1         | FLJ32786          | NM_144648    | G154 | 2675326       |
| mitogen-activated protein kinase kinase kinase 8                                                  | 5         | MAP3K8            | NM_005204    | G179 | 2915414       |
| v-ets erythroblastosis virus E26 oncogene homolog 1 (avian)                                       | 5         | ETS1              | NM_005238    | G069 | 2947628       |
| protein kinase cAMP-dependent regulatory type I alpha (tissue specific extinguisher 1)            | 6.5       | PRKAR1A           | NM_002734    | G179 | 2968213       |
| TRK-fused gene                                                                                    | 0.5       | TFG               | NM_001007565 | G069 | 2978906       |
| succinate dehydrogenase complex subunit D integral membrane protein                               | 1         | SDHD              | NM_003002    | G154 | 2995701       |
| protein kinase cGMP-dependent type II                                                             | 8.25      | PRKG2             | NM_006259    | G197 | 2997065       |
| pre-B-cell leukemia transcription factor 1                                                        | 0.5       | PBX1              | NM_002585    | G179 | 3004350       |
| MCM5 minichromosome maintenance deficient 5 cell division cycle 46 (S. cerevisiae)                | 4         | MCM5              | NM_006739    | G069 | 3122614       |
| guanine monophosphate synthetase                                                                  | 1         | GMPS              | NM_003875    | G179 | 3160663       |
| interferon regulatory factor 2 binding protein 2                                                  | 1.5       | IRF2BP2           | NM_182972    | G069 | 3186464       |
| Abelson helper integration site                                                                   | 1         | AHI1              | NM_017651    | G069 | 3510585       |
| v-myc myelocytomatosis viral oncogene homolog (avian)                                             | 1         | MYC               | NM_002467    | G154 | 3837816       |
| KIAA0117 protein                                                                                  | 3.25      | RBM34             | NM_015014    | G154 | 4266740       |
| Runt-related transcription factor 1 translocated to 1 (cyclin D-related)                          | 1         | RUNX1T1           | NM_175635    | G197 | 4385719       |
| BCL2-like 1                                                                                       | 3         | BCL2L1            | NM_001191    | G154 | 4419781       |
| homeo box D11                                                                                     | 1         | HOXD11            | NM_021192    | G069 | 4540805       |
| homeo box D11                                                                                     | 3         | HOXD11            | NM_021192    | G179 | 4591613       |
| Kruppel-like factor 4 (gut)                                                                       | 5         | KLF4              | NM_004235    | G197 | 4794098       |
| neuroblastoma RAS viral (v-ras) oncogene homolog                                                  | 1         | HRAS              | NM_005343    | G197 | 5305590       |
| transcription factor 12 (HTF4 helix-loop-helix transcription factors 4)                           | 19.75     | TCF12             | NM_003205    | G179 | 5787597       |
| midline 1 (Opitz/BBB syndrome)                                                                    | 1         | MID1              | NM_000381    | G179 | 5899127       |
| transcription factor 12 (HTF4 helix-loop-helix transcription factors 4)                           | 1         | TCF12             | NM_003205    | G179 | 5999285       |
| transcription factor 12 (HTF4 helix-loop-helix transcription factors 4)                           | 5         | TCF12             | NM_003205    | G069 | 6040336       |
| SRY (sex determining region Y)-box 3                                                              | 1         | SOX3              | NM_005634    | G179 | 6300426       |

| Gene Name                                                                          | Capture # | Gene Abbreviation | RefSeq    | Dog  | Distance (bp) |
|------------------------------------------------------------------------------------|-----------|-------------------|-----------|------|---------------|
| 5-aminoimidazole-4-carboxamide ribonucleotide formyltransferase/IMP cyclohydrolase | 6         | ATIC              | NM_004044 | G154 | 7023442       |
| suppression of tumorigenicity 13 (colon carcinoma) (Hsp70 interacting protein)     | 2         | ST13              | NM_003932 | G069 | 7051517       |
| Abelson helper integration site                                                    | 5         | AHI1              | NM_017651 | G197 | 7141860       |
| homeo box D11                                                                      | 4         | HOXD11            | NM_021192 | G179 | 8881253       |
| homeo box D11                                                                      | 1         | HOXD11            | NM_021192 | G154 | 9576217       |
| chemokine (C-C motif) receptor 5                                                   | 1.5       | EEF1A1            | NM_001402 | G179 | 12536378      |
| related RAS viral (r-ras) oncogene homolog 2                                       | 1         | RRAS2             | NM_012250 | G154 | 13277540      |
| related RAS viral (r-ras) oncogene homolog 2                                       | 1         | RRAS2             | NM_012250 | G197 | 13385444      |

'Capture #' refers to the numbers of time a specific RIS was identified in a 96-well sequencing format (given the weight of 1) or 384-well sequencing format (given the weight of 0.25)

Shaded rows indicate top 10% of captured RIS for the before chemotherapy data set based on 'Capture #'
