# Supplementary material
Source: PubMed Central journal article supplement (PMC2686180)
Supplement: blood-2008-09-176412_3.pdf [file blood-2008-09-176412_3.pdf]

| Gene Name                                                                                         | Capture # | Gene Abbreviation | RefSeq       | Dog  | Distance (bp) |
|---------------------------------------------------------------------------------------------------|-----------|-------------------|--------------|------|---------------|
| MYST histone acetyltransferase (monocytic leukemia) 4                                             | 1         | MYST4             | NM_012330    | G197 | 5122          |
| annexin A1                                                                                        | 4         | ANXA1             | NM_000700    | G069 | 8641          |
| runt-related transcription factor 1 (acute myeloid leukemia 1; aml1 oncogene)                     | 13.5      | RUNX1             | NM_001754    | G179 | 22598         |
| tec protein tyrosine kinase                                                                       | 0.25      | TEC               | NM_003215    | G197 | 23119         |
| runt-related transcription factor 1 (acute myeloid leukemia 1; aml1 oncogene)                     | 1.5       | RUNX1             | NM_001754    | G069 | 24777         |
| growth arrest-specific 7                                                                          | 1         | GAS7              | NM_201432    | G179 | 46801         |
| mutL homolog 1 colon cancer nonpolyposis type 2 (E. coli)                                         | 1         | MLH1              | NM_000249    | G069 | 53092         |
| chromodomain helicase DNA binding protein 3                                                       | 0.25      | CHD3              | NM_001005273 | G069 | 53942         |
| MADS box transcription enhancer factor 2 polypeptide C (myocyte enhancer factor 2C)               | 0.75      | MEF2C             | NM_002397    | G154 | 57975         |
| PC4 and SFRS1 interacting protein 1                                                               | 0.5       | PSIP1             | NM_021144    | G154 | 69973         |
| SWAP-70 protein                                                                                   | 1         | SWAP70            | NM_015055    | G069 | 73256         |
| LIM and SH3 protein 1                                                                             | 0.5       | LASP1             | NM_006148    | G197 | 74041         |
| LIM and SH3 protein 1                                                                             | 1         | LASP1             | NM_006148    | G179 | 77266         |
| MADS box transcription enhancer factor 2 polypeptide C (myocyte enhancer factor 2C)               | 0.25      | MEF2C             | NM_002397    | G197 | 84035         |
| high mobility group AT-hook 2                                                                     | 4         | HMGA2             | NM_001015886 | G197 | 86019         |
| histone 4 H4                                                                                      | 1         | HIST1H4I          | NM_003495    | G179 | 89866         |
| Fanconi anemia complementation group D2                                                           | 2         | FANCD2            | NM_001018115 | G154 | 106298        |
| stromal antigen 1                                                                                 | 5         | STAG1             | NM_005862    | G197 | 114107        |
| myelodysplasia syndrome 1                                                                         | 1         | MDS1              | NM_004991    | G069 | 123367        |
| cut-like 1 CCAAT displacement protein (Drosophila)                                                | 1         | CUTL1             | NM_001913    | G154 | 127902        |
| potassium channel tetramerisation domain containing 2                                             | 15.25     | KCTD2             | NM_015353    | G069 | 142652        |
| cyclin D2                                                                                         | 3         | CCND2             | NM_001759    | G179 | 142774        |
| signal transducer and activator of transcription 5A S-antigen; retina and pineal gland (arrestin) | 2         | STAT5A            | NM_003152    | G179 | 150105        |
| kinase insert domain receptor (a type III receptor tyrosine kinase)                               | 7         | SAG               | NM_000541    | G154 | 180391        |
| RAR-related orphan receptor C                                                                     | 3         | KDR               | NM_002253    | G179 | 188044        |
| RAR-related orphan receptor C                                                                     | 0.5       | RORC              | NM_005060    | G069 | 197695        |
| chromosome 14 open reading frame 43                                                               | 6         | C14orf43          | NM_194278    | G179 | 235520        |
| solute carrier family 27 (fatty acid transporter) member 1                                        | 1         | SLC27A1           | NM_198580    | G154 | 237369        |
| xeroderma pigmentosum complementation group A                                                     | 9         | XPA               | NM_000380    | G154 | 260058        |
| myeloid leukemia factor 1                                                                         | 4         | MLF1              | NM_022443    | G069 | 270434        |
| Oxysterol binding protein-like 3                                                                  | 2         | OSBPL3            | NM_015550    | G179 | 273561        |
| FIP1 like 1 (S. cerevisiae)                                                                       | 0.75      | FIP1L1            | NM_030917    | G154 | 298555        |
| chemokine (C-C motif) receptor 5                                                                  | 7         | EEF1A1            | NM_001402    | G154 | 369781        |
| SRY (sex determining region Y)-box 4                                                              | 47        | SOX4              | NM_003107    | G197 | 381600        |
| Forkhead box O3A                                                                                  | 0.25      | FOXO3A            | NM_201559    | G069 | 396917        |
| nascent-polypeptide-associated complex alpha polypeptide                                          | 1         | NACA              | NM_005594    | G069 | 417905        |
| Thousand and one amino acid protein kinase                                                        | 3         | TAOK2             | NM_004783    | G179 | 427359        |
| Lymphoid nuclear protein related to AF4                                                           | 1         | AFF3              | NM_001025108 | G197 | 502707        |
| non-POU domain containing octamer-binding                                                         | 2.5       | NONO              | NM_007363    | G069 | 509564        |
| fibroblast growth factor receptor 1 (fms-related tyrosine kinase 2 Pfeiffer syndrome)             | 0.5       | FGFR1             | NM_000604    | G069 | 522199        |
| homeo box A7                                                                                      | 5         | HOXA7             | NM_006896    | G154 | 528631        |
| retinoic acid receptor alpha                                                                      | 1         | NPM1              | NM_002520    | G197 | 532435        |
| damage-specific DNA binding protein 2 48kDa                                                       | 1         | DDB2              | NM_000107    | G197 | 548530        |
| tec protein tyrosine kinase                                                                       | 4.5       | TEC               | NM_003215    | G179 | 557656        |
| calcium/calmodulin-dependent protein kinase kinase 2 beta                                         | 2         | CAMKK2            | NM_006549    | G179 | 604594        |
| human immunodeficiency virus type 1 enhancer binding protein 1                                    | 1         | HIVEP1            | NM_002114    | G197 | 631700        |
| mutL homolog 1 colon cancer nonpolyposis type 2 (E. coli)                                         | 0.25      | MLH1              | NM_000249    | G069 | 645073        |
| likely ortholog of mouse gene trap locus 3                                                        | 7.5       | GTL3              | NM_013242    | G197 | 747194        |
| Kruppel-like factor 3 (basic)                                                                     | 1         | KLF3              | NM_016531    | G197 | 773673        |
| DnaJ (Hsp40) homolog subfamily C member 9                                                         | 18.25     | DNAJC9            | NM_015190    | G154 | 806608        |

| Gene Name                                                                                                            | Capture # | Gene Abbreviation | RefSeq       | Dog  | Distance (bp) |
|----------------------------------------------------------------------------------------------------------------------|-----------|-------------------|--------------|------|---------------|
| clathrin heavy polypeptide-like 1                                                                                    | 2         | CLTCL1            | NM_001835    | G179 | 828036        |
| retinoic acid receptor alpha                                                                                         | 1         | NPM1              | NM_002520    | G179 | 854528        |
| hypothetical protein MGC19780                                                                                        | 1         | ALG14             | NM_144988    | G069 | 978947        |
| nuclear receptor coactivator 2                                                                                       | 10.25     | NCOA2             | NM_006540    | G197 | 1008512       |
| disrupter of silencing 10                                                                                            | 1         | SAS10             | NM_020368    | G154 | 1035632       |
| clathrin heavy polypeptide-like 1                                                                                    | 25        | CLTCL1            | NM_001835    | G069 | 1080769       |
| smoothened homolog (Drosophila)                                                                                      | 15.75     | SMO               | NM_005631    | G069 | 1135723       |
| heat shock 90kDa protein 1 beta                                                                                      | 0.25      | HSPCB             | NM_007355    | G154 | 1162536       |
| heat shock 90kDa protein 1 beta                                                                                      | 1         | HSPCB             | NM_007355    | G154 | 1190899       |
| clathrin heavy polypeptide-like 1                                                                                    | 4         | CLTCL1            | NM_001835    | G197 | 1271834       |
| succinate dehydrogenase complex subunit C<br>integral membrane protein 15kDa                                         | 1         | SDHC              | NM_001035511 | G069 | 1289844       |
| runt-related transcription factor 2                                                                                  | 2.5       | RUNX2             | NM_001015051 | G069 | 1300612       |
| mutS homolog 2 colon cancer nonpolyposis type<br>1 (E. coli)                                                         | 2         | MSH2              | NM_000251    | G154 | 1360059       |
| lipoma HMGIC fusion partner                                                                                          | 1.75      | LHFP              | NM_005780    | G197 | 1362980       |
| interleukin 17 receptor B                                                                                            | 1         | IL17RB            | NM_018725    | G179 | 1375525       |
| Meis1 myeloid ecotropic viral integration site 1<br>homolog (mouse)                                                  | 1         | MEIS1             | NM_002398    | G179 | 1428841       |
| heparanase                                                                                                           | 0.5       | HPSE              | NM_006665    | G069 | 1462342       |
| oxysterol binding protein-like 3                                                                                     | 1.25      | OSBPL3            | NM_015550    | G197 | 1488132       |
| lymphocyte cytosolic protein 1 (L-plastin)                                                                           | 13        | LCP1              | NM_002298    | G154 | 1567085       |
| smoothened homolog (Drosophila)                                                                                      | 2         | SMO               | NM_005631    | G179 | 1567178       |
| nucleoporin 98kDa                                                                                                    | 1         | NUP98             | NM_016320    | G197 | 1618391       |
| B-cell CLL/lymphoma 11A (zinc finger protein)                                                                        | 2         | BCL11A            | NM_018014    | G179 | 1658386       |
| v-myc myelocytomatosis viral oncogene homolog<br>(avian)                                                             | 3         | MYC               | NM_002467    | G179 | 1796231       |
| insulin-like growth factor 1 receptor                                                                                | 21.5      | IGF1R             | NM_000875    | G154 | 1852262       |
| chemokine (C-C motif) receptor 5                                                                                     | 0.5       | EEF1A1            | NM_001402    | G069 | 1852414       |
| insulin-like growth factor 1 receptor                                                                                | 17        | IGF1R             | NM_000875    | G154 | 1852467       |
| ets variant gene 4 (E1A enhancer binding protein<br>E1AF)                                                            | 1         | ETV4              | NM_001986    | G154 | 1916119       |
| pleiomorphic adenoma gene 1                                                                                          | 1.25      | PLAG1             | NM_002655    | G197 | 1927276       |
| Kruppel-like factor 6                                                                                                | 4         | KLF6              | NM_001300    | G069 | 2016264       |
| interleukin 7                                                                                                        | 0.75      | IL7               | NM_000880    | G069 | 2119607       |
| high mobility group AT-hook 1                                                                                        | 1         | HMGA1             | NM_002131    | G197 | 2133480       |
| oxysterol binding protein-like 3                                                                                     | 4         | OSBPL3            | NM_015550    | G069 | 2145546       |
| stromal antigen 1                                                                                                    | 3         | STAG1             | NM_005862    | G069 | 2205726       |
| GNAS complex locus                                                                                                   | 1         | GNAS              | NM_000516    | G197 | 2272606       |
| succinate dehydrogenase complex subunit D<br>integral membrane protein                                               | 1         | SDHD              | NM_003002    | G179 | 2305284       |
| Werner syndrome                                                                                                      | 1         | WRN               | NM_000553    | G069 | 2355959       |
| disrupter of silencing 10                                                                                            | 3.25      | SAS10             | NM_020368    | G069 | 2368465       |
| growth factor independent 1                                                                                          | 1         | GFI1              | NM_005263    | G069 | 2441748       |
| chromosome 14 open reading frame 49                                                                                  | 29        | C14orf49          | NM_152592    | G179 | 2528284       |
| BCL2-like 1                                                                                                          | 15        | BCL2L1            | NM_001191    | G069 | 2534385       |
| sialyltransferase 1 (beta-galactoside alpha-2-6-<br>sialyltransferase)                                               | 3         | ST6GAL1           | NM_173216    | G197 | 2561111       |
| retinoic acid receptor alpha                                                                                         | 2         | ALK               | NM_004304    | G154 | 2669146       |
| retinoic acid receptor alpha                                                                                         | 1         | ALK               | NM_004304    | G197 | 2680096       |
| excision repair cross-complementing rodent repair<br>deficiency complementation group 2 (xeroderma<br>pigmentosum D) | 1         | ERCC2             | NM_000400    | G179 | 2750901       |
| mature T-cell proliferation 1                                                                                        | 1         | MTCP1             | NM_001018025 | G179 | 2771781       |
| Werner syndrome                                                                                                      | 2         | WRN               | NM_000553    | G179 | 2787947       |
| runt-related transcription factor 1 (acute myeloid<br>leukemia 1; aml1 oncogene)                                     | 1         | EVI1              | NM_005241    | G197 | 2795706       |
| ets variant gene 1                                                                                                   | 1         | ETV1              | NM_004956    | G154 | 2865499       |
| mitogen-activated protein kinase kinase kinase 8                                                                     | 2         | MAP3K8            | NM_005204    | G069 | 2917857       |
| runt-related transcription factor 1 (acute myeloid<br>leukemia 1; aml1 oncogene)                                     | 1         | RUNX1             | NM_001754    | G197 | 2947788       |
| RER1 homolog (S. cerevisiae)                                                                                         | 1.25      | RER1              | NM_007033    | G197 | 2949056       |
| protein kinase cAMP-dependent regulatory type I<br>alpha (tissue specific extinguisher 1)                            | 1         | PRKAR1A           | NM_002734    | G179 | 2968213       |
| protein kinase cAMP-dependent regulatory type I<br>alpha (tissue specific extinguisher 1)                            | 1         | PRKAR1A           | NM_002734    | G179 | 3012561       |

| Gene Name                                                                                                                          | Capture # | Gene Abbreviation | RefSeq       | Dog  | Distance (bp) |
|------------------------------------------------------------------------------------------------------------------------------------|-----------|-------------------|--------------|------|---------------|
| bullous pemphigoid antigen 1 230/240kDa                                                                                            | 2         | DST               | NM_015548    | G154 | 3507985       |
| protein kinase cAMP-dependent regulatory type I alpha (tissue specific extinguisher 1)                                             | 3.75      | PRKAR1A           | NM_002734    | G197 | 3735649       |
| related RAS viral (r-ras) oncogene homolog 2                                                                                       | 1         | RRAS2             | NM_012250    | G197 | 3747095       |
| neuroblastoma RAS viral (v-ras) oncogene homolog                                                                                   | 1         | HRAS              | NM_005343    | G069 | 4171895       |
| gephyrin                                                                                                                           | 1         | GPHN              | NM_001024218 | G179 | 4226356       |
| KIAA0117 protein                                                                                                                   | 2         | RBM34             | NM_015014    | G197 | 4260194       |
| BCL2-like 1                                                                                                                        | 1         | BCL2L1            | NM_001191    | G154 | 4419781       |
| mitogen-activated protein kinase kinase kinase 8                                                                                   | 1         | MAP3K8            | NM_005204    | G179 | 4426613       |
| transcription factor 12 (HTF4 helix-loop-helix transcription factors 4)                                                            | 2         | TCF12             | NM_003205    | G069 | 4577179       |
| excision repair cross-complementing rodent repair deficiency complementation group 3 (xeroderma pigmentosum group B complementing) | 0.25      | ERCC3             | NM_000122    | G069 | 5442455       |
| transcription factor 12 (HTF4 helix-loop-helix transcription factors 4)                                                            | 1         | TCF12             | NM_003205    | G179 | 5787597       |
| WD repeat domain 11                                                                                                                | 2.5       | BRWD2             | NM_018117    | G069 | 6033265       |
| golgi associated PDZ and coiled-coil motif containing                                                                              | 2         | GOPC              | NM_001017408 | G179 | 6425350       |
| succinate dehydrogenase complex subunit C integral membrane protein 15kDa                                                          | 17        | SDHC              | NM_001035511 | G069 | 6822032       |
| epidermal growth factor receptor (erythroblastic leukemia viral (v-erb-b) oncogene homolog avian)                                  | 0.5       | EGFR              | NM_005228    | G069 | 7036131       |
| suppression of tumorigenicity 13 (colon carcinoma) (Hsp70 interacting protein)                                                     | 4         | ST13              | NM_003932    | G154 | 7386609       |
| succinate dehydrogenase complex subunit D integral membrane protein                                                                | 1         | SDHD              | NM_003002    | G197 | 8265995       |
| cyclin-dependent kinase 4                                                                                                          | 1         | CDK4              | NM_000075    | G197 | 8658851       |
| homeo box D11                                                                                                                      | 1         | HOXD11            | NM_021192    | G197 | 9229585       |
| related RAS viral (r-ras) oncogene homolog 2                                                                                       | 0.5       | RRAS2             | NM_012250    | G069 | 10148301      |
| related RAS viral (r-ras) oncogene homolog 2                                                                                       | 4.75      | RRAS2             | NM_012250    | G069 | 10257675      |
| Ewing sarcoma breakpoint region 1                                                                                                  | 1         | EWSR1             | NM_013986    | G197 | 11023109      |
| Ewing sarcoma breakpoint region 1                                                                                                  | 2         | EWSR1             | NM_013986    | G179 | 11024003      |
| Ewing sarcoma breakpoint region 1                                                                                                  | 4         | EWSR1             | NM_013986    | G069 | 11143626      |

'Capture #' refers to the numbers of time a specific RIS was identified in a 96-well sequencing format (given the weight of 1) or 384-well sequencing format (given the weight of 0.25)

Shaded rows indicate top 10% of captured RIS for the after chemotherapy data set based on 'Capture #'
