# Supplementary material
Source: PubMed Central journal article supplement (PMC2686180)
Supplement: blood-2008-09-176412_4.pdf [file blood-2008-09-176412_4.pdf]

| Gene Name                                                                              | Capture #<br>Before/After | Gene<br>Abbreviation | RefSeq    | Dog  | Distance (bp) |
|----------------------------------------------------------------------------------------|---------------------------|----------------------|-----------|------|---------------|
| Myelodysplasia syndrome 1                                                              | 0.5/1                     | MDS1                 | NM_004991 | G069 | 123367        |
| potassium channel tetramerisation domain containing 2                                  | 1/ <b><u>15.25</u></b>    | KCTD2                | NM_015353 | G069 | 142652        |
| S-antigen; retina and pineal gland (arrestin)                                          | 4/7                       | SAG                  | NM_000541 | G154 | 180391        |
| kinase insert domain receptor (a type III receptor tyrosine kinase)                    | 1/3                       | KDR                  | NM_002253 | G179 | 188044        |
| xeroderma pigmentosum complementation group A                                          | <b><u>13</u></b> /9       | XPA                  | NM_000380 | G154 | 260058        |
| nascent-polypeptide-associated complex alpha polypeptide                               | <b><u>9</u></b> /1        | NACA                 | NM_005594 | G069 | 417905        |
| thousand and one amino acid protein kinase                                             | 0.5/3                     | TAOK2                | NM_004783 | G179 | 427359        |
| homeo box A7                                                                           | 5/5                       | HOXA7                | NM_006896 | G154 | 528631        |
| calcium/calmodulin-dependent protein kinase kinase 2 beta                              | 1/2                       | CAMKK2               | NM_006549 | G179 | 604594        |
| likely ortholog of mouse gene trap locus 3                                             | 4.25/7.5                  | GTL3                 | NM_013242 | G197 | 747194        |
| DnaJ (Hsp40) homolog subfamily C member 9                                              | 0.5/ <b><u>18.25</u></b>  | DNAJC9               | NM_015190 | G154 | 806608        |
| smoothened homolog (Drosophila)                                                        | 1/ <b><u>15.75</u></b>    | SMO                  | NM_005631 | G069 | 1135723       |
| clathrin heavy polypeptide-like 1                                                      | 2/4                       | CLTCL1               | NM_001835 | G197 | 1271834       |
| high mobility group AT-hook 1                                                          | 5/1                       | HMGA1                | NM_002131 | G197 | 2133480       |
| GNAS complex locus                                                                     | 3/1                       | GNAS                 | NM_000516 | G197 | 2272606       |
| Werner syndrome                                                                        | 1/1                       | WRN                  | NM_000553 | G069 | 2355959       |
| protein kinase cAMP-dependent regulatory type I alpha (tissue specific extinguisher 1) | <b><u>6.5</u></b> /1      | PRKAR1A              | NM_002734 | G179 | 2968213       |
| BCL2-like 1                                                                            | 3/1                       | BCL2L1               | NM_001191 | G154 | 4419781       |
| transcription factor 12 (HTF4 helix-loop-helix transcription factors 4)                | <b><u>19.75</u></b> /1    | TCF12                | NM_003205 | G179 | 5787597       |

Bold underline value in 'Capture # Before/After' column denotes a top ten 10% most frequently captured RIS from supplemental table 2 and 3 either before chemotherapy or after chemotherapy
